# Supplementary material
Source: PubMed Central journal article supplement (PMC4283413)

TGF- $\beta$ 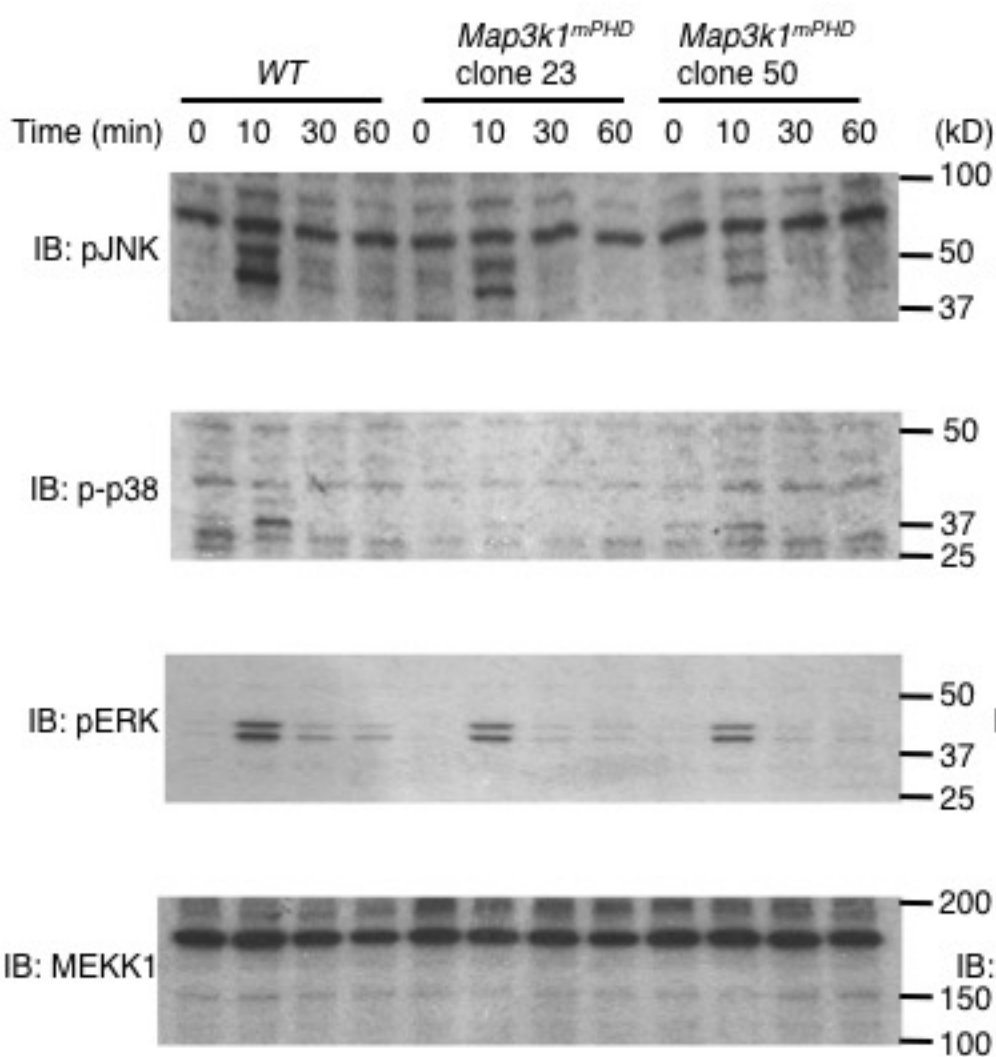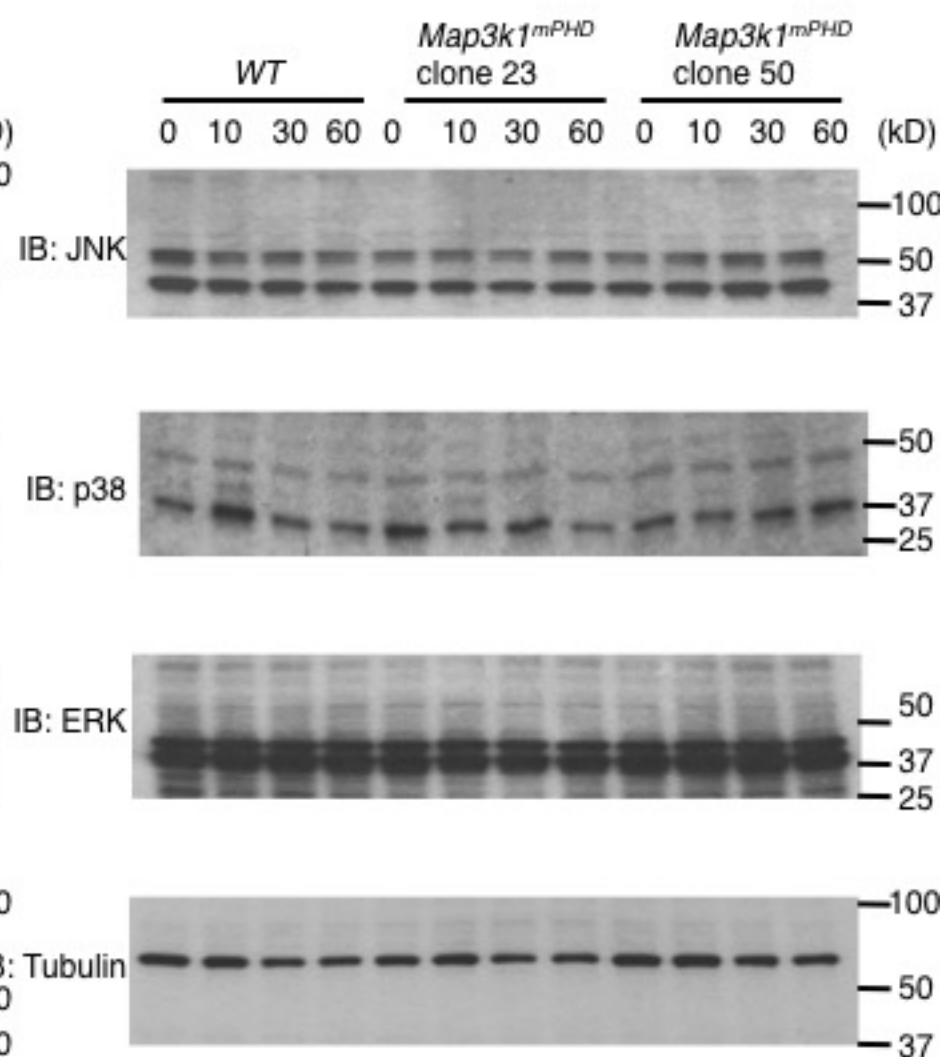

Supplement: embj0033-2581-sd3.pdf [file embj0033-2581-sd3.pdf]
