# Supplementary material
Source: PubMed Central journal article supplement (PMC4283413)

TGF- $\beta$

Additional data 4

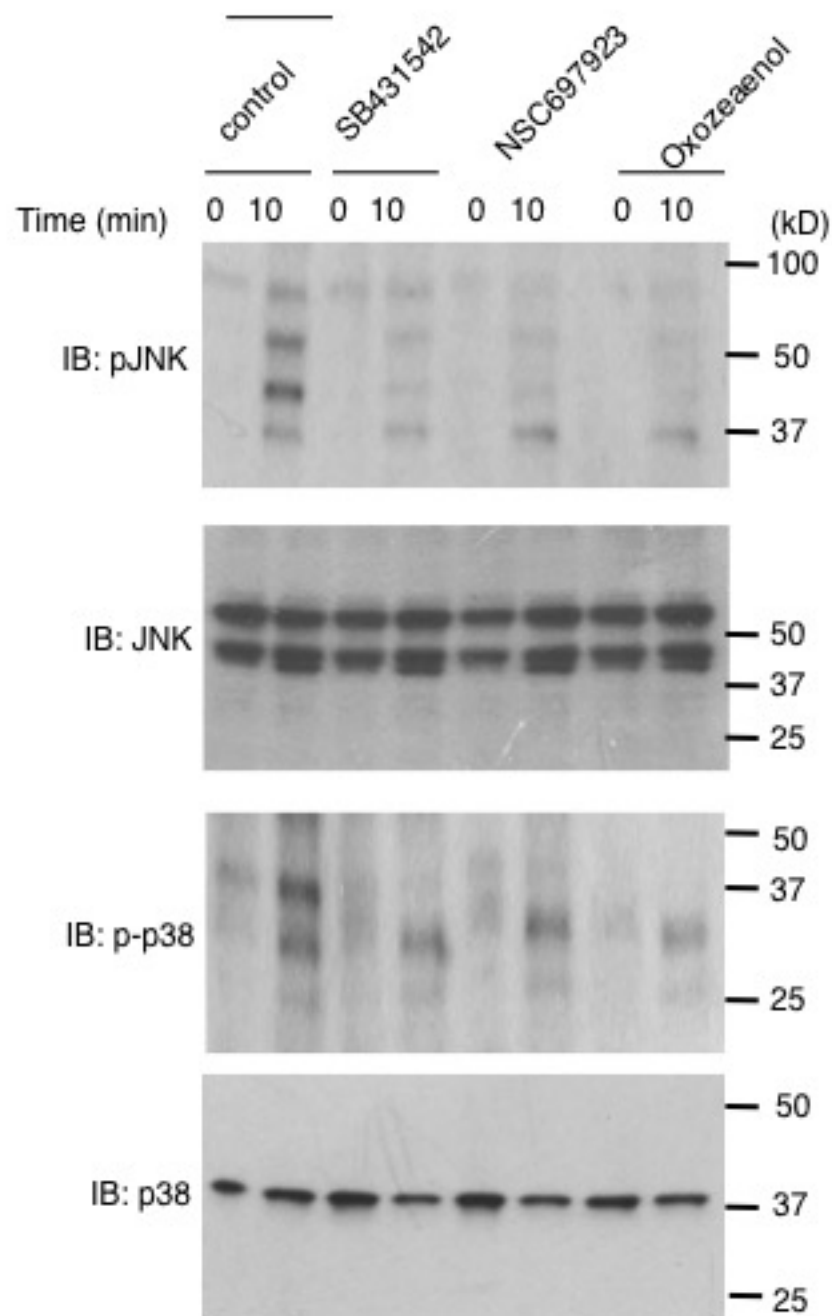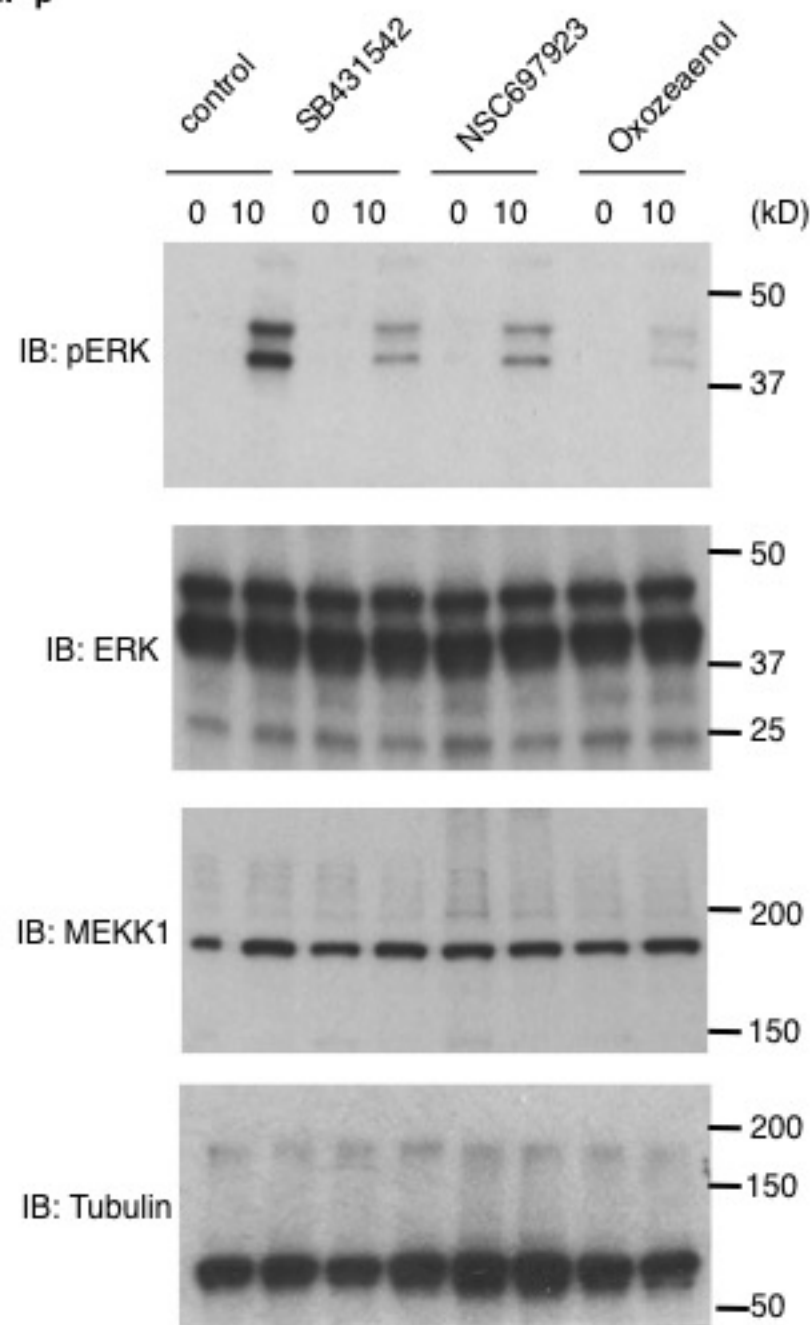

Supplement: embj0033-2581-sd4.pdf [file embj0033-2581-sd4.pdf]
