# Supplementary material
Source: PubMed Central journal article supplement (PMC4283413)

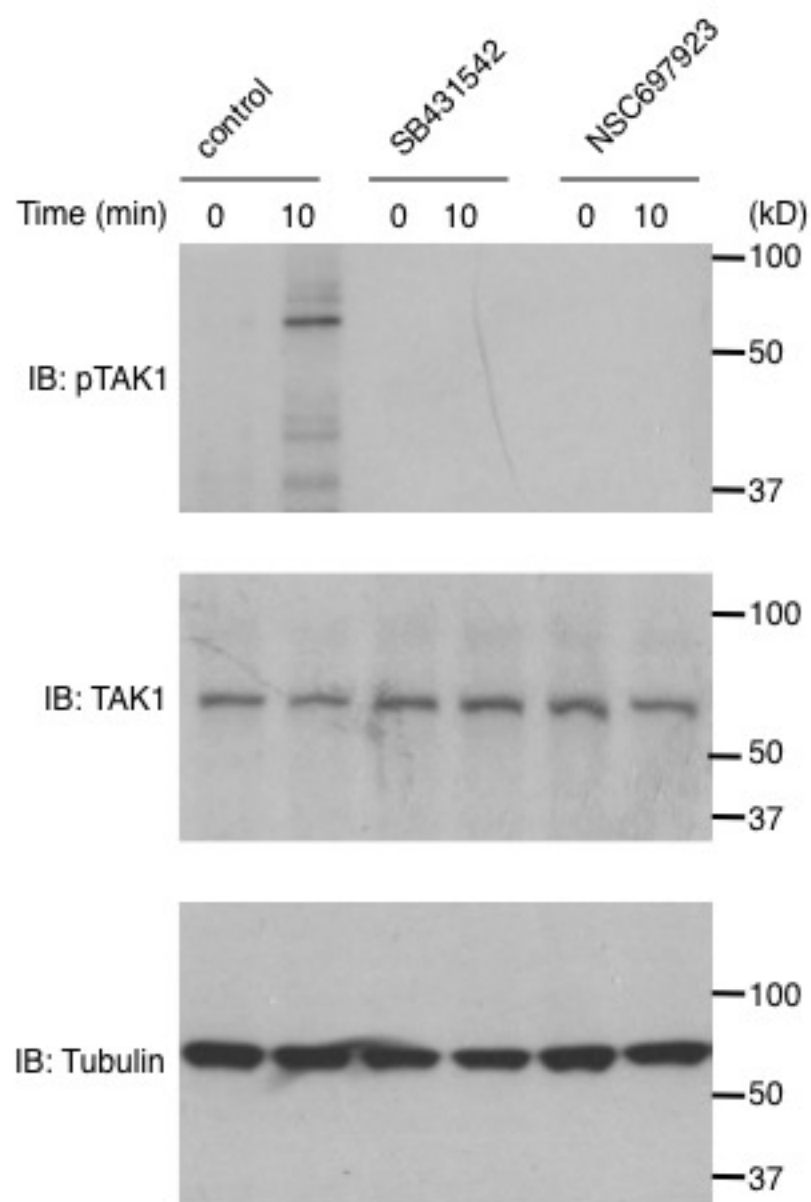

Supplement: embj0033-2581-sd6.pdf [file embj0033-2581-sd6.pdf]
