# Supplementary material
Source: PubMed Central journal article supplement (PMC4283413)
Supplement: embj0033-2581-sd7.pdf [file embj0033-2581-sd7.pdf]

**Additional data 8**Epithelium  
(endoderm)Epidermis  
(ectoderm)Muscle  
(mesoderm)Cartilage  
(mesoderm)*WT**Map3k1<sup>mPHD</sup>**Tab1<sup>-/-</sup>*
