# Supplementary material
Source: PubMed Central journal article supplement (PMC4283413)
Supplement: embj0033-2581-sd10.pdf [file embj0033-2581-sd10.pdf]

WT

*Map3k1<sup>mPHD/+</sup>*

Heart



WT

*Map3k1<sup>mPHD/+</sup>*

Testis
