# Supplementary material
Source: PubMed Central journal article supplement (PMC4283413)
Supplement: embj0033-2581-sd11.pdf [file embj0033-2581-sd11.pdf]

## Supplementary Information

### Figure S1

Characterization of the MEKK1 PHD motif. (A) Quantitation of the relative MEKK1 and MEKK1 mPHD kinase activity in cells (□ control, ■ MEKK1 and ■ MEKK1 mPHD). (B) Identification of E2 conjugating enzymes for the MEKK1 PHD. Ubiquitination reactions were performed containing MEKK1 PHD, UBE2D2, UBE2D3, UBE2J1 and UBE2N:UBE2V1 as indicated. Reactions were analysed by IB using the indicated antibodies. MEKK1 PHD loading was confirmed by silver staining. (C) Identification of types of Ub formed by the MEKK1 PHD and E2 conjugating enzymes. Ubiquitination reactions were performed containing Ub, lysineless Ub, MEKK1 PHD, UBE2D2, UBE2D3, UBE2J1 and UBE2N:UBE2V1 as indicated. Reactions were analysed by IB using the indicated antibodies. MEKK1 PHD loading was confirmed by silver staining. (D) Identification of the DUB enzymes that can remove Ub from the MEKK1 PHD. Ubiquitination reactions containing Ub, MEKK1 PHD and UBE2N:UBE2V1 were performed. After the ubiquitination reaction the following DUB enzymes were added: Otubain, USP14, USP8, USP7, USP2, BAP1, A20, Ataxin-3, UCH-L3, UCH-L1 and Isopeptidase T as indicated. Reactions were analysed by IB using the indicated antibodies. MEKK1 PHD loading was confirmed by silver staining. (E) Yeast-two hybrid assay identifying the interaction between UBE2N and MEKK1. Y190 yeast were transformed by the indicated constructs. Results are representative of three independent experiments.

### Figure S2

*Map3k1<sup>mPHD</sup>* ES cells have normal SMAD activation following TGF- $\beta$  treatment. (A) *WT* and *Map3k1<sup>mPHD</sup>* ES cells were plated onto low serum media, rested and stimulated with TGF- $\beta$  (10 ng/ml) for 10, 30 and 60 mins or left unstimulated. Cells were lysed and IB performed using the indicated antibodies. (B) MEKK1 stability is partially dependent upon the MEKK1 PHD. *WT* and *Map3k1<sup>mPHD</sup>* ES cell clones were left unstimulated or stimulated for up to 8 hrs with 500 mM sorbitol. Lysates were prepared and analysed by IB with the indicated antibodies (arrow heads indicate MEKK1). (C) Schematic diagram illustrating MEKK1 PHD signaling in ES cells. Results are representative of three independent experiments.

### Figure S3

MEKK1 PHD bioinformatics and *in vitro* ubiquitination analyses of protein array screen hits. (A) Ingenuity IPA tree diagram showing interactions of E1+E2+E3 protein array hits with components of the TGF- $\beta$  signaling pathways. Key: ● complex, 🧑 enzyme/scaffold, 🏠 growth factor, 🧑 kinase, 🏠 transcriptional regulator and 🌐 complex/group/other. Solid lines indicate binding only. Solid arrows indicate direct interactions. Dotted arrows indicate indirect interactions. (B) Ubiquitination assay was performed using UBE1, TAB1, MEKK1, MEKK1 mPHD and UBE2N:UBE2V1. Reactions were analysed by IB using the indicated antibodies. Lane 3 indicates substrate ubiquitination by the MEKK1 PHD and lane 5 indicates MEKK1 PHD autoubiquitination. (C) Ubiquitination assay was performed using UBE1, TNIP1, MEKK1, MEKK1 mPHD and UBE2N:UBE2V1. Reactions were analysed by IB using the indicated antibodies. (D) Ubiquitination assay was performed using UBE1, TNIP2, MEKK1, MEKK1 mPHD and UBE2N:UBE2V1. Reactions were analysed by IB using the indicated antibodies. (E) Ubiquitination assay was performed using UBE1, TRAF2, MEKK1, MEKK1 mPHD and

UBE2N:UBE2V1. Reactions were analysed by IB using the indicated antibodies. (F) Ubiquitination assay was performed using UBE1, STAM1, MEKK1, MEKK1 mPHD and UBE2N:UBE2V1. Reactions were analysed by IB using the indicated antibodies. Results are representative of three independent experiments.

#### Figure S4

Mechanism of MEKK1 PHD activation of MAPK signaling in ES cells. (A) The MEKK1 mPHD mutant is unable to induce TAB1 ubiquitination *in vivo*. HEK 293 cells were transiently transfected as indicated. 48 hrs later cells were lysed and analysed by IP and IB using the indicated antibodies. (B) MEKK1 and TAB1 copurify from cells. HEK 293 cells were transfected with the indicated constructs, lysates made and IB performed using the indicated antibodies. (C) Schematic illustrating the generation of *Tab1*<sup>-/-</sup> ES cells. (D) Expression of TAB1 in *Tab1*<sup>-/-</sup> ES cells. Lysates were made from *WT* and *Tab1*<sup>-/-</sup> ES cells and analysed by the indicated antibodies. (E) *WT* or *Tab1*<sup>-/-</sup> ES cells were kept in low serum conditions and stimulated or not for 10 mins with EGF (100 ng/ml). Lysates were made and IB performed using the indicated antibodies. (F) Schematic showing the deletion fragments used to detect the region of TAB1 ubiquitination by MEKK1 PHD (TAK1 indicates the TAK1 binding domain). (G) Mutation of TAB1 residues K294A, K319A, K335A and K350A (mTAB1) ablates TAB1 ubiquitination by MEKK1 in cells. HEK 293 cells were transfected with the indicated constructs. Lysates were made and IP and IB performed using the indicated antibodies. (H) Mutation of TAB1 residues K294A, K319A, K335A and K350A (mTAB1) ablates the TAB1:TAK1 association in cells. HEK 293 cells were transfected with the indicated constructs. Lysates were made and IP and IB were performed using the indicated antibodies. (I) endogenous MEKK1 was IP from ES cell lysates stimulated by TGF-β for 10 mins. Lysates and IP were IB with the indicated antibodies (J) *WT* or *Map3k1*<sup>mPHD</sup> ES cells were treated with TGF-β or not for 10 mins. Lysates were made and IB performed using the indicated antibodies. Results are representative of three independent experiments.

#### Figure S5

MEKK1 ubiquitination of TAB1 enhances TAK1 activation. (A) Schematic diagram showing the reaction steps and components of the MEKK1 ubiquitination and TAK1 kinase assays. (B) Recombinant MEKK1, TAK1, MEKK1 mPHD and TAB1 were expressed and purified from sf9 cells and a fraction of the resulting input proteins were IB with the indicated antibodies. The indicated purified recombinant proteins were then used in ubiquitination assays with UBE1, UBE2N:UBE2V1 and Ub for 60 mins. Lys63-linked Ub in the reactions were identified by IB. Finally, recombinant TAK1 was added to the ubiquitinated proteins and kinase assays performed as indicated. The reactions were stopped in loading buffer after 30 mins and analysed by IB using the indicated antibodies. (C) A TAK1 activation assay was performed as before using TAK1, UBE1, UBE2N:UBE2V1 and Ub, and also MEKK1, TAB1 and mTAB1 as indicated. IB was performed using the indicated antibodies.

#### Figure S6

Global gene expression analysis of *Map3k1*<sup>mPHD</sup> ES cells. (A) *WT* and *Map3k1*<sup>mPHD</sup> ES cell microarray data sets were analysed using Ingenuity iReport. (B) Ingenuity IPA tree diagram showing interactions of Affymetrix hits with components of the TGF-β signaling pathway. Key: ○ other, ◇ enzyme, ∇ kinase, ○ transcription

regulator,  $\square$  transporter,  $\diamond$  peptidase,  $\odot$  complex/group. Solid lines indicate binding only. Solid arrows indicate direct interactions. Dotted arrows indicate indirect interactions. (C)  $\blacksquare$  *WT* (unstimulated),  $\blacksquare$  *WT* (day 9),  $\blacksquare$  *Map3k1<sup>mPHD</sup>* (unstimulated),  $\blacksquare$  *Map3k1<sup>mPHD</sup>* (day 9),  $\blacksquare$  *Tab1<sup>-/-</sup>* (unstimulated) and  $\blacksquare$  *Tab1<sup>-/-</sup>* ES cells (day 9) were left unstimulated or differentiated for 9 days. Real time PCR was performed using primers specific for the genes *Nanog* and *Oct4*. The average relative expression ( $\pm$  SEM) of the indicated gene mRNA from 3 independent experiments was statistically analysed, where appropriate, by two-tailed Student's t test (\*,  $p \leq 0.05$ ; \*\*,  $p \leq 0.01$ ; \*\*\*,  $p \leq 0.001$ ). (D)  $\blacksquare$  *WT* (unstimulated),  $\blacksquare$  *WT* (day 9),  $\blacksquare$  *Map3k1<sup>mPHD</sup>* (unstimulated),  $\blacksquare$  *Map3k1<sup>mPHD</sup>* (day 9),  $\blacksquare$  *Tab1<sup>-/-</sup>* (unstimulated) and  $\blacksquare$  *Tab1<sup>-/-</sup>* (day 9) ES cells were plated under differentiation conditions without LIF, proliferation was measured by CFSE assay and analysed by FACS.

### Figure S7

*TGF $\beta$ R* expression analysis of *Map3k1<sup>mPHD</sup>* ES cells. (A) Heat map showing *Tgfbr1*, *Tgfbr2* and *Tgfbr3* expression between pluripotent *WT* and *Map3k1<sup>mPHD</sup>* ES cells. (B) Real time PCR showing gene expression between pluripotent  $\blacksquare$  *WT*,  $\blacksquare$  *Map3k1<sup>mPHD</sup>* and  $\blacksquare$  *Tab1<sup>-/-</sup>* ES cells for *TGF $\beta$ R*s. The average relative expression ( $\pm$  SEM) of the indicated gene mRNA from 3 independent experiments was statistically analysed, where appropriate, by two-tailed Student's t test (\*,  $p \leq 0.05$ ; \*\*,  $p \leq 0.01$ ; \*\*\*,  $p \leq 0.001$ ). (C) *WT*, *Map3k1<sup>mPHD</sup>* and *Tab1<sup>-/-</sup>* ES cells were grown continuously on serum in the presence of LIF. Lysates were made and analysed by IB using the indicated antibodies.

### Figure S8

*Map3k1<sup>mPHD</sup>* and *Tab1<sup>-/-</sup>* ES cells exhibit an altered differentiation pattern compared to *WT* ES cells.  $\blacksquare$  *WT*,  $\blacksquare$  *Map3k1<sup>mPHD</sup>* and  $\blacksquare$  *Tab1<sup>-/-</sup>* ES cells were plated under differentiation conditions without LIF for 9 days, mRNA was extracted and used for real-time PCR using primers specific for (A) neuroectoderm, (B) endoderm and (C) mesoderm genes. (D)  $\blacksquare$  DMSO,  $\blacksquare$  SB203580 and  $\blacksquare$  SB431542 treated *WT* ES cells were plated under differentiation conditions without LIF for 9 days, mRNA was extracted and used for real time PCR using primers specific for a mesoderm gene marker. (E) *Tab1<sup>-/-</sup>* ES cells were transfected with empty vector, TAB1 and mTAB1 as indicated. Transfected *Tab1<sup>-/-</sup>* and *WT* ES cells were lysed and IB was performed using the indicated antibodies. (F) *Tab1<sup>-/-</sup>* ES cells were transfected with  $\blacksquare$  vector,  $\blacksquare$  TAB1 or  $\blacksquare$  mTAB1, and plated, alongside  $\blacksquare$  *WT* ES cells, under differentiation conditions without LIF for 9 days, mRNA was extracted and used for real time PCR using primers specific for a mesoderm gene marker. The average relative expression ( $\pm$  SEM) of the indicated gene mRNA from 3 independent experiments was statistically analysed, where appropriate, by two-tailed Student's t test (\*,  $p \leq 0.05$ ; \*\*,  $p \leq 0.01$ ; \*\*\*,  $p \leq 0.001$ ).

### Figure S9

Analysis of MEKK1 PHD-dependent differentiation of *Tab1<sup>-/-</sup>* ES cells. *Tab1<sup>-/-</sup>* ES cells were transfected with  $\blacksquare$  CMV,  $\blacksquare$  CMV TAB1 or  $\blacksquare$  CMV mTAB1 and used alongside  $\blacksquare$  *WT* ES cells in differentiation assays for 6 days, mRNA was extracted and their RNAs analysed by real time PCR with primers specific for the neuroectoderm genes *Nestin* and *Pax6*. The average relative expression ( $\pm$  SEM) of the indicated gene mRNA from 3 independent experiments was statistically analysed,

where appropriate, by two-tailed Student's t test (\*,  $p \leq 0.05$ ; \*\*  $p \leq 0.01$ ; \*\*\*,  $p \leq 0.001$ ).

**Figure S10**

Characterization of *Map3k1<sup>mPHD/+</sup>* mice. (A) Bone marrow was harvested from *WT* and *Map3k1<sup>mPHD/+</sup>* mice. Cells were stained with antibodies for the B cell markers IL-7R, CD34, CD45, CD38 and IgM and analysed by FACS. (B) Thymi was extracted from *WT* and *Map3k1<sup>mPHD/+</sup>* mice. (C) Quantitation of the mass of thymi from ■ *WT* and ■ *Map3k1<sup>mPHD/+</sup>* mice. The average relative expression ( $\pm$  SEM) of the thymi from 3 independent experiments was statistically analysed by two-tailed Student's t test. Results are representative of three independent experiments.

**Table S1.** Listing of hits from Affymetrix screening (ArrayExpress accession: E-MTAB-1679). Hits indicate a 2-fold or more difference in gene expression between *Map3k1<sup>mPHD</sup>* and *WT ES* cells.

| ID       | Fold change | p-value     | Entrez Gene Name                                                                      | Location            | Type(s)                    |
|----------|-------------|-------------|---------------------------------------------------------------------------------------|---------------------|----------------------------|
| A2m      | -2.0057547  | 0.001857916 | alpha-2-macroglobulin                                                                 | Extracellular Space | transporter                |
| Acta1    | 2.7550673   | 1.65E-04    | actin, alpha 1, skeletal muscle                                                       | Cytoplasm           | other                      |
| Actc1    | 3.3069584   | 0.002083707 | actin, alpha, cardiac muscle 1                                                        | Cytoplasm           | enzyme                     |
| Anxa3    | 3.8823948   | 0.002311585 | annexin A3                                                                            | Cytoplasm           | enzyme                     |
| Anxa5    | 2.3316228   | 0.009822967 | annexin A5                                                                            | Plasma Membrane     | other                      |
| Car4     | 2.0156875   | 0.003673881 | carbonic anhydrase IV                                                                 | Plasma Membrane     | enzyme                     |
| Cald1    | 2.2011347   | 0.008693812 | caldesmon 1                                                                           | Plasma Membrane     | other                      |
| Capn2    | 2.4027152   | 0.008644544 | calpain 2, (m/II) large subunit                                                       | Cytoplasm           | peptidase                  |
| Ccl2     | -2.390797   | 0.003938371 | chemokine (C-C motif) ligand 13                                                       | Extracellular Space | cytokine                   |
| Chst15   | 2.0687666   | 0.020435842 | carbohydrate (N-acetyl)galactosamine 4-sulfate 6-O) sulfotransferase 4                | Plasma Membrane     | enzyme                     |
| Clcn5    | 2.0605805   | 0.007213574 | chloride channel, voltage-sensitive 5                                                 | Plasma Membrane     | ion channel                |
| Clu      | 2.2093937   | 0.001087975 | clusterin                                                                             | Extracellular Space | other                      |
| Cnn1     | 3.1327963   | 0.002744793 | calponin 1, basic, smooth muscle                                                      | Cytoplasm           | other                      |
| Cntrf    | 2.2550151   | 3.65E-05    | ciliary neurotrophic factor receptor                                                  | Plasma Membrane     | transmembrane receptor     |
| Colec12  | 2.4210675   | 0.002105767 | collectin sub-family member 12                                                        | Plasma Membrane     | transmembrane receptor     |
| Cryab    | 2.0318692   | 0.012150836 | crystallin, alpha B                                                                   | Nucleus             | other                      |
| Csrp1    | 2.3107538   | 0.002873714 | cysteine and glycine-rich protein 1                                                   | Nucleus             | other                      |
| Cxcl11   | 2.048385    | 0.018570151 | chemokine (C-X-C motif) ligand 11                                                     | Extracellular Space | cytokine                   |
| Cyr61    | 2.2087812   | 7.37E-04    | cysteine-rich, angiogenic inducer, 61                                                 | Extracellular Space | other                      |
| Ddx3y    | -2.9596515  | 5.51E-05    | DEAD (Asp-Glu-Ala-Asp) box polypeptide 3, Y-linked                                    | Cytoplasm           | other                      |
| Dock11   | 2.1563225   | 8.86E-04    | dedicator of cytokinesis 11                                                           | Cytoplasm           | other                      |
| Dsc2     | 2.1575687   | 0.008196608 | desmocollin 2                                                                         | Plasma Membrane     | other                      |
| Dsp      | 3.303479    | 0.0052969   | desmoplakin                                                                           | Plasma Membrane     | other                      |
| Dusp14   | 2.0176184   | 6.26E-04    | dual specificity phosphatase 14                                                       | unknown             | phosphatase                |
| Dusp4    | 2.5989609   | 6.06E-04    | dual specificity phosphatase 4                                                        | Nucleus             | phosphatase                |
| Edn1     | 3.0703537   | 0.004326449 | endothelin 1                                                                          | Extracellular Space | cytokine                   |
| Efemp1   | 2.4148428   | 0.004399272 | EGF containing fibulin-like extracellular matrix protein 1                            | Extracellular Space | enzyme                     |
| Efna5    | 2.0107615   | 0.01767725  | ephrin-A5                                                                             | Plasma Membrane     | kinase                     |
| Eif2s3y  | -2.784723   | 0.005807369 | eukaryotic translation initiation factor 2, subunit 3, structural gene only           | Cytoplasm           | translation regulator      |
| F3       | 2.4208796   | 0.009203905 | coagulation factor III (thromboplastin, tissue factor)                                | Plasma Membrane     | transmembrane receptor     |
| Fbln2    | -2.2116966  | 0.004935371 | fibulin 2                                                                             | Extracellular Space | other                      |
| Fermt1   | 2.1215284   | 0.001388512 | fermitin family member 1                                                              | Plasma Membrane     | other                      |
| Finc     | 2.6198037   | 5.60E-04    | filamin C, gamma                                                                      | Cytoplasm           | other                      |
| Fndc3c1  | 2.887473    | 0.001202381 | fibronectin type III domain containing 3C1                                            | unknown             | other                      |
| Gbp1     | 3.264705    | 1.87E-04    | guanylate binding protein 2, interferon-inducible                                     | Nucleus             | other                      |
| Gbp2     | 4.6560364   | 0.006907613 | guanylate binding protein 2                                                           | unknown             | enzyme                     |
| Gprc5c   | 2.4646301   | 0.012449834 | G protein-coupled receptor, family C, group 5, member C                               | Plasma Membrane     | G-protein coupled receptor |
| Grem1    | -2.8356338  | 0.010599915 | gremlin 1                                                                             | Extracellular Space | other                      |
| Igfbp3   | 4.294441    | 1.47E-04    | insulin-like growth factor binding protein 3                                          | Extracellular Space | other                      |
| Itga3    | 2.5575054   | 0.004522102 | integrin, alpha 3 (antigen CD49C, alpha 3 subunit of VLA-3 receptor)                  | Plasma Membrane     | other                      |
| Krt18    | 5.0943055   | 8.91E-04    | keratin 18                                                                            | Cytoplasm           | other                      |
| Krt19    | 4.536249    | 0.001772012 | keratin 19                                                                            | Cytoplasm           | other                      |
| Krt8     | 6.0431256   | 5.95E-04    | keratin 8                                                                             | Cytoplasm           | other                      |
| Lamc2    | 2.3562734   | 0.011176528 | laminin, gamma 2                                                                      | Extracellular Space | other                      |
| Lphn2    | 2.8834867   | 4.44E-05    | latrophilin 2                                                                         | Plasma Membrane     | G-protein coupled receptor |
| Mir92-1  | -2.2976387  | 0.00830584  | microRNA 25                                                                           | Cytoplasm           | microRNA                   |
| Nefl     | 3.2824752   | 0.004686247 | neurofilament, light polypeptide                                                      | Cytoplasm           | other                      |
| Nes      | 3.2208774   | 2.86E-04    | nestin                                                                                | Cytoplasm           | other                      |
| Nnat     | 2.564566    | 3.38E-05    | neuronatin                                                                            | Plasma Membrane     | transporter                |
| Nt5e     | 3.767016    | 3.96E-04    | 5'-nucleotidase, ecto (CD73)                                                          | Plasma Membrane     | phosphatase                |
| Nuak1    | 2.382953    | 0.003435363 | NUAK family, SNF1-like kinase, 1                                                      | unknown             | kinase                     |
| Otx2     | -2.4149704  | 8.42E-05    | orthodenticle homeobox 2                                                              | Nucleus             | transcription regulator    |
| Parva    | 2.030465    | 0.008783761 | parvin, alpha                                                                         | Cytoplasm           | other                      |
| Pcdh18   | 2.0676134   | 0.015142876 | protocadherin 18                                                                      | Extracellular Space | other                      |
| Phldb2   | 2.2002082   | 0.002353882 | pleckstrin homology-like domain, family B, member 2                                   | Cytoplasm           | other                      |
| Ppp4r4   | 2.6705232   | 0.00665947  | protein phosphatase 4, regulatory subunit 4                                           | Cytoplasm           | other                      |
| Prmt8    | -2.31923    | 0.011715327 | protein arginine methyltransferase 8                                                  | Nucleus             | enzyme                     |
| Prtg     | 2.2732003   | 8.05E-04    | protogenin                                                                            | unknown             | other                      |
| Ptgs2    | -2.0603693  | 0.006673997 | prostaglandin-endoperoxide synthase 2 (prostaglandin G/H synthase and cyclooxygenase) | Plasma Membrane     | enzyme                     |
| Rdh10    | 2.228082    | 0.006673997 | retinol dehydrogenase 10 (all-trans)                                                  | Nucleus             | enzyme                     |
| Rnf128   | 2.1034398   | 0.014772559 | ring finger protein 128, E3 ubiquitin protein ligase                                  | Cytoplasm           | enzyme                     |
| Runx1    | 2.1293156   | 4.98E-04    | runt-related transcription factor 1                                                   | Nucleus             | transcription regulator    |
| Sema6a   | 2.8991046   | 0.004744235 | sema domain, transmembrane domain (TM), and cytoplasmic domain (CTD) protein 6A       | Plasma Membrane     | transmembrane receptor     |
| Sfn      | 4.6045985   | 0.002139192 | stratifin                                                                             | Cytoplasm           | other                      |
| Slc25a24 | 2.5912123   | 0.001341933 | solute carrier family 25 (mitochondrial carrier; phosphate carrier) member 24         | Cytoplasm           | other                      |
| Sp5      | 2.2794976   | 0.040503327 | Sp5 transcription factor                                                              | Nucleus             | other                      |
| Spr2a1   | 4.5782948   | 5.27E-05    | small proline-rich protein 2G                                                         | Cytoplasm           | other                      |
| T        | 7.005557    | 0.002097362 | T, brachyury homolog (mouse)                                                          | Nucleus             | transcription regulator    |
| Tagln    | 2.737775    | 0.00483641  | transgelin                                                                            | Cytoplasm           | other                      |
| Tax1bp3  | 2.0935597   | 0.003977545 | Tax1 (human T-cell leukemia virus type I) binding protein 3                           | Nucleus             | transcription regulator    |
| Tec      | 2.0375817   | 7.56E-04    | tec protein tyrosine kinase                                                           | Cytoplasm           | kinase                     |
| Tes      | 2.0066843   | 1.40E-04    | testis derived transcript (3 LIM domains)                                             | Plasma Membrane     | other                      |
| Tgfb2    | 2.9551053   | 0.011359884 | transforming growth factor, beta 2                                                    | Extracellular Space | growth factor              |
| Tpm1     | 2.6363387   | 0.001206219 | tropomyosin 1, alpha                                                                  | Plasma Membrane     | other                      |
| Uty      | -3.2841432  | 7.41E-04    | ubiquitously transcribed tetratricopeptide repeat gene, Y chromosome                  | Nucleus             | other                      |
| Wnt3     | 2.3104796   | 0.003809417 | wingless-type MMTV integration site family, member 3                                  | Extracellular Space | other                      |

**Table S2.** List of hits from the E1+E2 protein array ranked by their Z score from highest to lowest.

| <b>Gene ID</b> | <b>Z score</b> |
|----------------|----------------|
| PELI1          | 18.719         |
| RNF4           | 18.703         |
| RNF34          | 18.692         |
| UBE3A          | 18.687         |
| BIRC4          | 18.685         |
| TRIM11         | 18.681         |
| BIRC7          | 18.679         |
| BIRC7          | 18.667         |
| RNF111         | 18.652         |
| BIRC3          | 18.645         |
| UBE2O          | 18.641         |
| RNF34          | 18.639         |
| STUB1          | 18.627         |
| RNF13          | 18.615         |
| UBE3A          | 18.609         |
| UBE2C          | 17.609         |
| LRSAM1         | 15.968         |
| LRSAM1         | 14.790         |
| TRIM21         | 14.143         |
| RFWD3          | 13.342         |
| PELI2          | 13.169         |
| NHEDC2         | 11.861         |
| RNF135         | 11.674         |
| NUDT6          | 11.541         |
| CBLB           | 10.908         |
| UBE2E2         | 10.631         |
| TSPAN17        | 10.090         |
| UBE2O          | 9.253          |
| POLI           | 8.642          |
| FLJ20160       | 7.630          |
| UBE2T          | 7.282          |
| DBF4B          | 6.787          |
| ACOX1          | 6.471          |
| UBE2D3         | 5.724          |
| UBE2B          | 4.650          |
| UBE2E1         | 4.599          |
| UBE2S          | 4.353          |
| ANKRD13A       | 4.308          |
| CALM2          | 4.277          |
| INTS3          | 4.190          |
| UBE1           | 4.132          |
| ANKRD13D       | 4.129          |
| TRIM52         | 3.855          |
| UBE2D2         | 3.764          |
| RNF11          | 3.721          |

|        |       |
|--------|-------|
| RNF122 | 3.649 |
| UBE2R2 | 3.632 |
| UBQLN4 | 3.558 |
| RHBDD1 | 3.438 |
| TRIM23 | 3.393 |
| SMURF1 | 3.333 |
| RIOK3  | 3.277 |
| RBP2   | 3.181 |
| THRA   | 3.052 |
| RNF182 | 3.026 |

**Table S3.** List of hits from the E1+E2+E3 protein array ranked by their Z score from highest to lowest.

| <b>Gene ID</b> | <b>Z score</b> |
|----------------|----------------|
| BAP1           | 10.806         |
| FKBP6          | 10.784         |
| NPLOC4         | 10.782         |
| RIOK3          | 10.781         |
| ASCC2          | 10.780         |
| UBE2V1         | 10.779         |
| UBADC1         | 10.778         |
| DNAJB6         | 10.776         |
| TOM1L2         | 10.776         |
| CUEDC1         | 10.776         |
| HBS1L          | 10.775         |
| SQSTM1         | 10.774         |
| RHBDD1         | 10.774         |
| APPL1          | 10.774         |
| MSL3L1         | 10.773         |
| ZFAND5         | 10.773         |
| TRAF2          | 10.771         |
| TNIP2          | 10.770         |
| TOM1           | 10.770         |
| RAD23A         | 10.770         |
| TNIP2          | 10.769         |
| UBXD1          | 10.768         |
| STAM1          | 10.768         |
| UBQLN4         | 10.767         |
| CD74           | 10.765         |
| HIP1           | 10.764         |
| UBXN7          | 11.275         |
| HGS            | 11.267         |
| C6orf106       | 11.262         |
| RAB3IL1        | 11.250         |
| STS-1          | 11.208         |
| TAB1           | 10.240         |
| DNAJB2         | 9.964          |
| RNF141         | 9.858          |
| FAM188A        | 9.835          |
| UBAP1          | 9.219          |
| DCUN1D1        | 9.652          |
| NEK10          | 9.152          |
| STAM2          | 8.848          |
| GRIPAP1        | 8.688          |
| YAF2           | 8.640          |
| UBXD1          | 9.057          |
| EPHA1          | 8.760          |
| SQSTM1         | 8.237          |
| UBE2D3         | 7.894          |

|          |       |
|----------|-------|
| RAD18    | 8.142 |
| RBCK1    | 8.121 |
| IMPACT   | 7.651 |
| HIP1R    | 7.921 |
| PSMD4    | 7.475 |
| HIP1R    | 7.842 |
| YAF2     | 7.424 |
| SPG20    | 7.779 |
| ZFAND3   | 7.509 |
| EPN1     | 6.548 |
| ZNF313   | 6.528 |
| UBE2G1   | 6.425 |
| DCUN1D2  | 6.664 |
| UCHL5    | 6.275 |
| CRELD1   | 6.252 |
| ATXN3    | 6.538 |
| UBXD8    | 6.045 |
| CCDC21   | 5.837 |
| UFD1L    | 5.431 |
| UBE2K    | 5.060 |
| MSL3L1   | 5.145 |
| USP28    | 4.785 |
| FAM184A  | 4.371 |
| GGA2     | 4.437 |
| PLEKHB2  | 4.236 |
| KRT36    | 4.142 |
| RNF126   | 3.905 |
| APEX2    | 3.857 |
| C20orf18 | 4.057 |
| ODF2     | 3.623 |
| FAM116B  | 3.508 |
| CARD14   | 3.398 |
| UBQLN1   | 3.275 |
| CCDC69   | 3.225 |
| RABEP2   | 3.210 |
| RAD51AP1 | 4.228 |
| TNIP1    | 3.899 |

**Table S4.** List of primers used in this study.

| <b>Gene</b>      | <b>Forward (5' – 3')</b> | <b>Reverse (5' – 3')</b> |
|------------------|--------------------------|--------------------------|
| <i>Brachyury</i> | CCGGTGCTGAAGGTAAATGT     | CCTCCATTGAGCTTGTTGGT     |
| <i>Gata4</i>     | AACACCCTGAGCAGGCCTC      | TTTCTGGGAAACTGGAGCTGG    |
| <i>Gata6</i>     | ATATGGCCTTGACTGACGGCG    | ATTCAGGCCAGGGCCAGAGCAC   |
| <i>L19</i>       | TGATCTGCTGACGGAGTTG      | GGAAAAGAAGGTCTGGTTGGA    |
| <i>Mash1</i>     | CCAGGCTGGAGCAAGGGA       | CGGTTGGCTTCGGGAGC        |
| <i>Mixl1</i>     | GACAGACCATGTACCCAGAC     | GCTTCAAACACCTAGCTTCAG    |
| <i>Nanog</i>     | CTTACAAGGGTCTGCTACTGA    | CTGCTTCCTGGCAAGGACC      |
| <i>Nestin</i>    | CTACATACAGGACTCTGCTGG    | CTCAGACATAGGTGGGATGG     |
| <i>Oct4</i>      | CACGAGTGGAAAGCAACTCA     | AGATGGTGGTCTGGCTGAAC     |
| <i>Pax6</i>      | ACACGCCCTGGTTGGTATC      | CATCTGAGCTTCATCCGAGTC    |
| <i>Ddx3y</i>     | GGAAACAGGTCTACGGTGCC     | GCGCCCTTTGCTCTCTGTATT    |
| <i>Otx2</i>      | GGGTGCAGGTATGGTTTAAGA    | GCAATGGTTGGGACTGAGGTA    |
| <i>Dusp14</i>    | CTGTAACAAGCACCGCTCCC     | CCTCCTTCGTGCTAAGGATTTTC  |
| <i>Tec</i>       | TCTGTCTTGGCTTGTCTCGG     | ACGATCTCCGGATTCCCTCT     |
| <i>Nnat</i>      | GCGAGAAGTGAGGTGTTTCAG    | CAGGAGCACCTGATGACACG     |
| <i>Dusp4</i>     | ACCAGTACAAGTGCATCCCC     | GTCCTTTACTGCGTCGATGT     |
| <i>Acta1</i>     | CATGTGCGACGAAGACGAGA     | CATACCTACCATGACACCCTGG   |
| <i>Tgfb2</i>     | AATGGCTCTCCTTCGACGTG     | AGGTGCCATCAATACCTGCAA    |
| <i>Nuak1</i>     | ATTGTCAACGGCAGGCCTTA     | CCGAGCATCTGAGGGTTGTG     |
| <i>Runx1</i>     | CAGGCAGGACGAATCACACT     | CTCGTGCTGGCATCTCTCA      |
| <i>Tagln</i>     | CGGCCTTTAAACCCCTCACC     | CATGTTGAGGCAGAGAAGGCT    |
| <i>Tgfbr1</i>    | GGCGAAGGCATTACAGTGTTT    | ATGACAGTGCGGTTATGGCA     |
| <i>Tgfbr2</i>    | TTTCCTGTTTCCCTCTCGGC     | GCTTCCATTTCACATCCGAC     |
| <i>Tgfbr3</i>    | GCGGAGTACCTTCAACCCAA     | CCGAGTAGCCATTGGTCTGG     |



**A****B****C**

**A**



**B**



**C**



**D**



**E**



**F**





**A**

**1. Protein expression**

↓ Purify

**2. Ubiquitination assay**



↓ IP: TAB1, wash and elute

**3. Kinase assay**



**B**



**C**





A



B



C



A



B



C



D



E



F





A



B



C
